# Supplementary material for: Ab initio molecular dynamics relaxation and intersystem crossing mechanisms of 5-azacytosine
Source: Royal Society of Chemistry journal article supplement (doi:10.1039/c6cp07919a), 2017-01-01
Supplement: c6cp07919a1.pdf [file c6cp07919a1.pdf]

# Ab Initio Molecular Dynamics Relaxation and Intersystem Crossing Mechanisms of 5-Azacytosine

Antonio Carlos Borin<sup>\*1</sup>, Sebastian Mai<sup>†2</sup>, Philipp Marquetand<sup>‡2</sup> and Leticia González<sup>§2</sup>

<sup>1</sup>Department of Fundamental Chemistry, Institute of Chemistry, University of São Paulo, NAP-PhotoTech the USP Consortium for Photochemical Technology, Av. Prof. Lineu Prestes 748, 05508-000, São Paulo, SP, Brazil.

<sup>2</sup>Institute of Theoretical Chemistry, Faculty of Chemistry, University of Vienna, Währinger Straße 17, 1090 Vienna, Austria.

## Cartesian coordinates of the optimized points

### Optimized with MRCIS

Stationary points, conical intersections, and intersystem crossing were optimized at the MRCIS level of theory and the def2-SVP basis sets, with a CAS(6,5) reference space (MRCIS(6,5)) based on a SA(3S+2T)-CASSCF(12,9) orbitals (averaging over 3 singlet and 2 triplet states in a single CASSCF (complete-active-space self-consistent-field) calculation). All geometries are given in .xyz format in Å.

|                                 |                                 |
|---------------------------------|---------------------------------|
| 12                              | 12                              |
| S0 minimum                      | S1 minimum (1pipi*)             |
| C +0.935445 +0.841721 -0.001999 | C +0.888321 +0.806950 -0.002767 |
| C -0.259672 -1.102571 +0.004465 | C -0.382071 -1.127271 +0.038820 |
| C -1.447353 +0.785618 +0.004022 | C -1.480746 +0.839174 +0.146849 |
| N -0.308212 +1.490692 +0.000655 | N -0.283220 +1.508776 -0.059506 |
| N +0.882127 -0.506338 +0.000772 | N +0.900226 -0.499149 +0.097660 |
| N -0.294771 -2.443873 +0.006775 | N -0.272204 -2.469598 -0.099260 |
| N -1.464034 -0.502014 +0.006118 | N -1.480895 -0.527572 +0.105429 |
| O +1.967265 +1.522002 -0.006279 | O +1.971923 +1.509660 -0.033796 |
| H -2.378925 +1.340745 +0.005207 | H -2.398527 +1.390555 +0.023599 |
| H -0.310211 +2.491343 -0.001789 | H -0.236615 +2.504992 -0.119700 |
| H -1.174328 -2.910534 +0.011478 | H -1.106896 -3.006082 +0.010234 |
| H +0.559062 -2.957426 +0.007013 | H +0.591971 -2.889991 +0.167944 |

\*ancborin@iq.usp.br

†sebastian.mai@univie.ac.at

‡philipp.marquetand@univie.ac.at

§leticia.gonzalez@univie.ac.at

12  
S1 minimum (1nNpi\*)  
C +0.985426 +0.975323 +0.010694  
C -0.359534 -1.186024 -0.032026  
C -1.476407 +0.818969 -0.041707  
N -0.252591 +1.535524 +0.129648  
N +0.795914 -0.437992 -0.083996  
N -0.261498 -2.549538 -0.109657  
N -1.508079 -0.540602 +0.015567  
O +2.012486 +1.500370 -0.002114  
H -2.380871 +1.376642 +0.137375  
H -0.263362 +2.535056 +0.105821  
H -1.129373 -3.013292 +0.075326  
H +0.518963 -2.959317 +0.365695

12  
T1 minimum (3pipi\*)  
C +0.908597 +0.847181 -0.126423  
C -0.382193 -1.116004 +0.084433  
C -1.467825 +0.824700 +0.188750  
N -0.281332 +1.513514 -0.020862  
N +0.827873 -0.432704 +0.422884  
N -0.209206 -2.437500 -0.195006  
N -1.470303 -0.513210 +0.111145  
O +1.947708 +1.347450 -0.560532  
H -2.384171 +1.390094 +0.183783  
H -0.293056 +2.473580 -0.304696  
H -1.062628 -2.950737 -0.291242  
H +0.510919 -2.906703 +0.317099

12  
S1/S2 CoIn (1nNpi\*/1pipi\*)  
C +0.920616 +0.847720 +0.007961  
C -0.375374 -1.146254 -0.002914  
C -1.476037 +0.833959 +0.003368  
N -0.276428 +1.530804 +0.001358  
N +0.874679 -0.481430 -0.010991  
N -0.263682 -2.494591 -0.049014  
N -1.458741 -0.525862 +0.011950  
O +1.993424 +1.511635 +0.026444  
H -2.401093 +1.382326 +0.041282  
H -0.242587 +2.528570 +0.037237  
H -1.093772 -3.018975 +0.132242  
H +0.606153 -2.894623 +0.232122

12  
S0/S1 CoIn (S1/S0 alpha, constrained)  
C +0.819814 +0.748009 +0.028823  
C -0.469709 -1.117660 +0.158940  
C -1.418858 +0.845663 +0.411795  
N -0.282422 +1.463784 -0.201019  
N +0.826739 -0.448870 +0.499174  
N -0.184049 -2.394045 -0.196014  
N -1.547468 -0.548136 +0.054648  
O +2.041383 +1.482926 -0.143426  
H -2.323006 +1.434335 +0.361833  
H -0.289012 +2.268915 -0.794959  
H -0.966316 -2.974406 -0.417493  
H +0.596883 -2.830119 +0.245081

12  
S0/S1 CoIn (S1/S0 beta)  
C +0.900545 +0.915413 +0.064447  
C -0.282804 -1.155864 -0.021627  
C -1.454827 +0.837135 -0.236618  
N -0.326306 +1.543304 +0.220173  
N +0.860289 -0.507045 +0.076258  
N -0.310431 -2.512833 -0.165470  
N -1.407775 -0.473385 +0.297333  
O +1.913163 +1.497934 -0.039179  
H -1.716688 +0.906247 -1.292806  
H -0.289273 +2.535709 +0.087884  
H -1.145381 -2.954873 +0.163311  
H +0.534344 -2.976129 +0.105852

12  
S0/S1 CoIn (S1/S0 gamma)  
C +0.919362 +0.786405 -0.092269  
C -0.444676 -1.126179 +0.124366  
C -1.364245 +0.793618 +0.390769  
N -0.244595 +1.478185 -0.160461  
N +0.592324 -0.360209 +0.698127  
N -0.159891 -2.385431 -0.305237  
N -1.603878 -0.539399 +0.073620  
O +1.965776 +1.028270 -0.555680  
H -2.193153 +1.410465 +0.707782  
H -0.349093 +2.216735 -0.829783  
H -0.958661 -2.937492 -0.546899  
H +0.557719 -2.878071 +0.186313

12  
S1/T2 MECP (1nNpi\*/3pipi)  
C +0.979224 +0.968209 +0.009833  
C -0.357074 -1.180962 -0.029498  
C -1.478427 +0.822270 -0.040564  
N -0.256088 +1.534497 +0.125427  
N +0.820913 -0.453424 -0.074748  
N -0.263983 -2.543850 -0.117765  
N -1.508411 -0.541871 +0.019100  
O +2.003727 +1.499552 -0.007853  
H -2.383365 +1.378790 +0.139615  
H -0.266534 +2.533528 +0.095107  
H -1.130889 -3.009869 +0.066076  
H +0.521595 -2.957183 +0.345752

## Optimized with MS-CASPT2

These CoIns were optimized at the MS-CASPT2<sup>1</sup> level of theory with numerical gradients, the algorithm of Levine et al.,<sup>2</sup> and the ORCA optimizer.<sup>3</sup> The calculations employed orbitals from an SA(4S)-CASSCF(14,10)/ANO-L-VDZP calculation with Cholesky decomposition and a non-relativistic Hamiltonian; in the MS-CASPT2 step, all four roots were included, the IPEA shift<sup>4</sup> was set to zero, and an imaginary shift<sup>5</sup> of 0.2 a.u. was applied. For  $S_1/S_0(\alpha)$ , the C<sub>2</sub>=O bond length was constrained to 1.44Å in order to avoid convergence to the  $S_1/S_0(\gamma)$  CoIn. All geometries are given in .xyz format in Å.

12

S0/S1 CoIn (S1/S0 alpha, constrained)

C +0.766409 +0.747264 +0.074537  
C -0.410056 -1.116020 +0.143600  
C -1.439537 +0.875230 +0.467270  
N -0.291310 +1.449070 -0.307190  
N +0.882807 -0.452253 +0.462587  
N -0.176420 -2.429092 -0.233676  
N -1.546309 -0.543555 +0.088506  
O +1.983034 +1.505158 -0.011629  
H -2.345421 +1.454896 +0.254642  
H -0.231722 +2.428132 -0.579970  
H -1.049881 -2.961368 -0.269825  
H +0.546666 -2.875023 +0.334437

12

S0/S1 CoIn (S0/S1 beta)

C +0.913226 +0.921870 +0.139561  
C -0.298461 -1.121526 +0.134020  
C -1.468952 +0.807904 -0.185833  
N -0.319441 +1.578493 +0.125768  
N +0.880603 -0.502382 +0.257864  
N -0.343936 -2.430941 -0.186336  
N -1.421387 -0.456619 +0.549557  
O +1.985092 +1.507978 +0.078956  
H -1.726468 +0.690351 -1.251133  
H -0.274255 +2.537666 -0.229991  
H -1.197720 -2.945277 +0.027399  
H +0.546552 -2.931905 -0.200272

12

S0/S1 CoIn (S0/S1 gamma)

C +0.903770 +0.744051 -0.122225  
C -0.461030 -1.140762 +0.197079  
C -1.359583 +0.837783 +0.514785  
N -0.250975 +1.485721 -0.099121  
N +0.625469 -0.349042 +0.793614  
N -0.121901 -2.359588 -0.334138  
N -1.611289 -0.569215 +0.158352  
O +1.960637 +0.910303 -0.701197  
H -2.255417 +1.460284 +0.475035  
H -0.372098 +2.269522 -0.741247  
H -0.924150 -2.917867 -0.634027  
H +0.583556 -2.884294 +0.183738

## Conical intersections

In Figure S1 we show the structures of the  $S_1/S_0$  conical intersections (CoIns) of 5AC. The CoIns in (a) – (c) were optimized with the MS-CASPT2 method in order to improve upon the results from Giussani et al.,<sup>6</sup> which were optimized with the SS-CASPT2//CASSCF method. The reoptimizations at the MS-CASPT2 level was necessary, because SS-CASPT2 does not predict the correct topology of conical intersections.<sup>7</sup> The CoIns in (d) – (f) were optimized with the MRCIS method specified in the main manuscript.

The MS-CASPT2 optimizations showed that  $S_1/S_0$  ( $\alpha$ ) is actually not a minimum on the  $S_1/S_0$  intersection seam, as previously reported by Giussani et al.<sup>6</sup> Instead, on both MS-CASPT2 and MRCIS levels the optimization of  $S_1/S_0$  ( $\alpha$ )—characterized by a very long  $C_2=O$  bond—leads to  $S_1/S_0$  ( $\gamma$ ). Hence, the structures of  $S_1/S_0$  ( $\alpha$ ) shown in Figure S1 (a) and (d) could only be obtained with optimizations under a constrained  $C_2=O$  bond length.

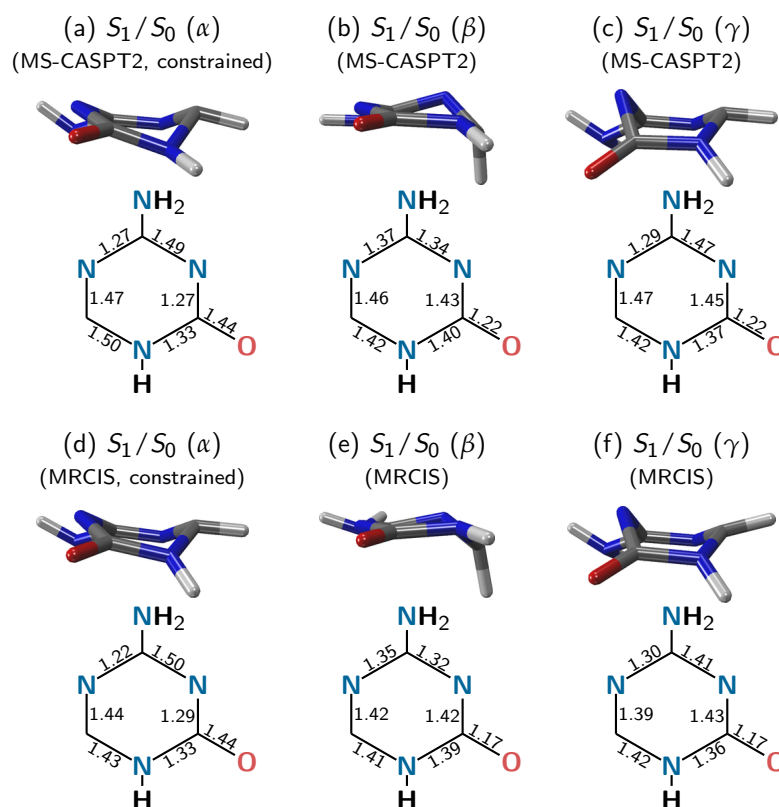

Figure S1: Depictions of the conical intersection geometries of 5AC. The CoIns  $\alpha$ ,  $\beta$ , and  $\gamma$  in the top row were obtained with MS-CASPT2 optimizations, whereas the bottom row was optimized with MRCIS. Note that the  $\alpha$  CoIns (panels (a) and (d)) are not real minima on the intersection seam, but were obtained by constraining the  $C=O$  bond length.

## Supplementary References

- [1] J. Finley, P.-Å. Malmqvist, B. O. Roos and L. Serrano-Andrés, *Chem. Phys. Lett.*, 1998, **288**, 299.
- [2] B. G. Levine, J. D. Coe and T. J. Martinez, *J. Phys. Chem. B*, 2008, **112**, 405–413.
- [3] F. Neese, *WIREs Comput. Mol. Sci.*, 2012, **2**, 73–78.
- [4] G. Ghigo, B. O. Roos and P.-Å. Malmqvist, *Chem. Phys. Lett.*, 2004, **396**, 142 – 149.
- [5] N. Forsberg and P.-Å. Malmqvist, *Chem. Phys. Lett.*, 1997, **274**, 196 – 204.
- [6] A. Giussani, M. Merchán, J. P. Gobbo and A. C. Borin, *J. Chem. Theory Comput.*, 2014, **10**, 3915–3924.
- [7] J.-P. Malrieu, J.-L. Heully and A. Zaitsevskii, *Theor. Chim. Acta*, 1995, **90**, 167–187.
